# Supplementary material
Source: PubMed Central journal article supplement (PMC6741505)
Supplement: jin-0006-0793-s01.pdf [file jin-0006-0793-s01.pdf]

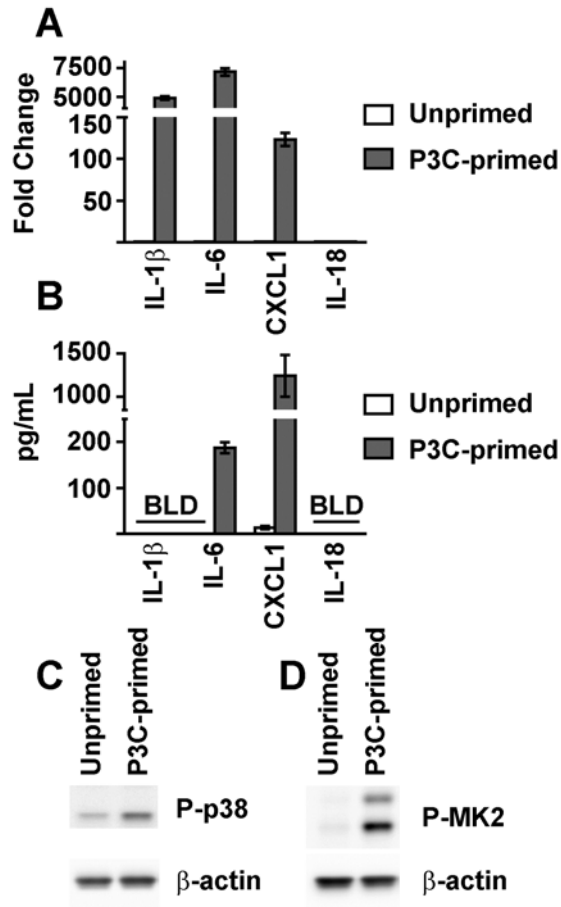

Bauler TJ et al, Figure S1

### Supplemental Figure 1. Activation of BMM with P3C

BMM were primed with P3C (500 ng/mL) or left untreated (unprimed). **(A)** RNA was harvested from cells 16 h after priming. qRT-PCR was performed to examine the indicated transcripts. **(B)** Supernatants were harvested 16 h after infection and the quantity of IL-6 and CXCL1 was measured by ELISA. **(C and D)** Cell lysates were generated at the indicated times after priming. Western blots were probed with antibodies to P-MK2, P-p38 and  $\beta$ -actin as loading control. BLD = below level of detection. Each data point depicts the mean of triplicate samples. Error bars represent SEM. Data are representative of three independent experiments.
